# Supplementary material
Source: PubMed Central journal article supplement (PMC6944341)
Supplement: AnnalsATS.201905-366OC_weissman_data_supplement.pdf [file AnnalsATS.201905-366OC_weissman_data_supplement.pdf]

## **Digital Supplement**

### **Potentially preventable intensive care unit admissions in the United States, 2006 - 2015**

Gary E. Weissman, MD, MSHP; Meeta Prasad Kerlin, MD, MSCE; Yihao Yuan, MS; Rachel Kohn, MD, MSCE; George L. Anesi, MD, MBE, MSCE; Peter W. Groeneveld, MD, MS; Rachel M. Werner, MD, PhD; Scott D. Halpern, MD, PhD

August 29, 2019

#### **Administrative definitions**

Each year of data in each database provided a different number of diagnostic codes. In order to standardize our definitions and minimize classification bias, we used only the first ten diagnostic codes even when more were available.

#### **Intensive care unit stay**

Definitions for an intensive care unit (ICU) admission are based on a prior validation study (1). A hospitalization was considered to be associated with ICU care if any of the following revenue center codes was found in the claims: 200, 201, 202, 203, 204, 207, 208, 209, 210, 211, 212, 213, 219. These revenue center codes also correspond in the MedPAR database to ICU indicator codes 0, 1, 2, 3, 4, 7, 8 and 9, and to coronary care indicator codes 0, 1, 2, 3, and 9. Notably, codes for intermediate care units were not considered in this analysis.

#### **Ambulatory care sensitive conditions**

Ambulatory care sensitivity conditions were identified based on the published definitions of Prevention Quality Indicators (PQIs) from the Agency for Health Research and Quality (2). Version 5.0 of the definition was used for all claims from 2006 through the third quarter of 2015. Version 6.0 was used in the fourth quarter of 2015 to account for the transition to ICD-10 codes. We used the standard published definitions in all cases except for PQI 13 which was retired in version 6.0 and so was excluded from our definition of version 5.0.

#### **Life-limiting malignancy**

Life-limiting malignancy was defined using the published set of ICD-9 codes (Supplemental Table 1) used in a previous study examining eligibility and enrollment in hospice services among cancer patients(3). Since no comparable definition exists for ICD-10 codes, we used the 2016 CMS General Equivalency File to generate a corresponding set of ICD-10-CM codes (Supplemental Table 2). A hospitalization was considered associated with a life-

limiting malignancy if any of the reported diagnostic codes were found in the tables below.  
 The code used to generate the ICD-10-CM codes is available online:  
<https://gist.github.com/gweissman/63a162b64969f56b33ce5f6e0c13f51c>

*Supplemental Table E1: Previously published ICD-9-CM codes associated with a life-limiting malignancy.*

| ICD-9 Code | Diagnosis                                                          |
|------------|--------------------------------------------------------------------|
| 1500       | Malignant neoplasm of cervical esophagus                           |
| 1501       | Malignant neoplasm of thoracic esophagus                           |
| 1502       | Malignant neoplasm of abdominal esophagus                          |
| 1503       | Malignant neoplasm of upper third of esophagus                     |
| 1504       | Malignant neoplasm of middle third of esophagus                    |
| 1505       | Malignant neoplasm of lower third of esophagus                     |
| 1508       | Malignant neoplasm of other specified part of esophagus            |
| 1509       | Malignant neoplasm of esophagus, unspecified site                  |
| 151        | Malignant neoplasm of stomach                                      |
| 1510       | Malignant neoplasm of cardia                                       |
| 1511       | Malignant neoplasm of pylorus                                      |
| 1512       | Malignant neoplasm of pyloric antrum                               |
| 1513       | Malignant neoplasm of fundus of stomach                            |
| 1514       | Malignant neoplasm of body of stomach                              |
| 1515       | Malignant neoplasm of lesser curvature of stomach, unspecified     |
| 1516       | Malignant neoplasm of greater curvature of stomach, unspecified    |
| 1518       | Malignant neoplasm of other specified sites of stomach             |
| 1519       | Malignant neoplasm of stomach, unspecified site                    |
| 155        | Malignant neoplasm of liver and intrahepatic bile ducts            |
| 1550       | Malignant neoplasm of liver, primary                               |
| 1551       | Malignant neoplasm of intrahepatic bile ducts                      |
| 1552       | Malignant neoplasm of liver, not specified as primary or secondary |
| 1570       | Malignant neoplasm of head of pancreas                             |
| 1571       | Malignant neoplasm of body of pancreas                             |
| 1572       | Malignant neoplasm of tail of pancreas                             |
| 1573       | Malignant neoplasm of pancreatic duct                              |
| 1574       | Malignant neoplasm of islets of langerhans                         |
| 1578       | Malignant neoplasm of other specified sites of pancreas            |
| 1579       | Malignant neoplasm of pancreas, part unspecified                   |
| 1580       | Malignant neoplasm of retroperitoneum                              |

- 1588 Malignant neoplasm of specified parts of peritoneum
- 1589 Malignant neoplasm of peritoneum, unspecified
- 159 Malignant neoplasm of other and ill-defined sites within the digestive organs and peritoneum
- 1590 Malignant neoplasm of intestinal tract, part unspecified
- 1591 Malignant neoplasm of spleen, not elsewhere classified
- 1598 Malignant neoplasm of other sites of digestive system and intra-abdominal organs
- 1599 Malignant neoplasm of ill-defined sites within the digestive organs and peritoneum
- 1620 Malignant neoplasm of trachea
- 1622 Malignant neoplasm of main bronchus
- 1623 Malignant neoplasm of upper lobe, bronchus or lung
- 1624 Malignant neoplasm of middle lobe, bronchus or lung
- 1625 Malignant neoplasm of lower lobe, bronchus or lung
- 1628 Malignant neoplasm of other parts of bronchus or lung
- 1629 Malignant neoplasm of bronchus and lung, unspecified
- 1630 Malignant neoplasm of parietal pleura
- 1631 Malignant neoplasm of visceral pleura
- 1638 Malignant neoplasm of other specified sites of pleura
- 1639 Malignant neoplasm of pleura, unspecified
- 1641 Malignant neoplasm of heart
- 1642 Malignant neoplasm of anterior mediastinum
- 1643 Malignant neoplasm of posterior mediastinum
- 1648 Malignant neoplasm of other parts of mediastinum
- 1649 Malignant neoplasm of mediastinum, part unspecified
- 1650 Malignant neoplasm of upper respiratory tract, part unspecified
- 1658 Malignant neoplasm of other sites within the respiratory system and intrathoracic organs
- 1659 Malignant neoplasm of ill-defined sites within the respiratory system
- 191 Malignant neoplasm of brain
- 1910 Malignant neoplasm of cerebrum, except lobes and ventricles
- 1911 Malignant neoplasm of frontal lobe
- 1912 Malignant neoplasm of temporal lobe
- 1913 Malignant neoplasm of parietal lobe
- 1914 Malignant neoplasm of occipital lobe
- 1915 Malignant neoplasm of ventricles

1916 Malignant neoplasm of cerebellum nos  
 1917 Malignant neoplasm of brain stem  
 1918 Malignant neoplasm of other parts of brain  
 1919 Malignant neoplasm of brain, unspecified  
 195 Malignant neoplasm of other and ill-defined sites  
 1951 Malignant neoplasm of thorax  
 1952 Malignant neoplasm of abdomen  
 1953 Malignant neoplasm of pelvis  
 1958 Malignant neoplasm of other specified sites  
 1973 Secondary malignant neoplasm of other respiratory organs  
 1974 Secondary malignant neoplasm of small intestine including duodenum  
 1975 Secondary malignant neoplasm of large intestine and rectum  
 1976 Secondary malignant neoplasm of retroperitoneum and peritoneum  
 1977 Malignant neoplasm of liver, secondary  
 1978 Secondary malignant neoplasm of other digestive organs and spleen  
 1980 Secondary malignant neoplasm of kidney  
 1981 Secondary malignant neoplasm of other urinary organs  
 1982 Secondary malignant neoplasm of skin  
 1983 Secondary malignant neoplasm of brain and spinal cord  
 1984 Secondary malignant neoplasm of other parts of nervous system  
 1985 Secondary malignant neoplasm of bone and bone marrow  
 1986 Secondary malignant neoplasm of ovary  
 1987 Secondary malignant neoplasm of adrenal gland  
 1988 Other specified sites  
 19881 Secondary malignant neoplasm of breast  
 19882 Secondary malignant neoplasm of genital organs  
 19889 Secondary malignant neoplasm of other specified sites  
 1990 Disseminated malignant neoplasm without specification of site  
 1991 Other malignant neoplasm without specification of site  
 1992 Malignant neoplasm associated with transplant organ  
 20500 Acute myeloid leukemia, without mention of having achieved remission  
 20502 Acute myeloid leukemia, in relapse  
 20520 Subacute myeloid leukemia, without mention of having achieved remission  
 20522 Subacute myeloid leukemia, in relapse  
 20530 Myeloid sarcoma, without mention of having achieved remission  
 20532 Myeloid sarcoma, in relapse

|       |                                                                                       |
|-------|---------------------------------------------------------------------------------------|
| 20580 | Other myeloid leukemia, without mention of having achieved remission                  |
| 20582 | Other myeloid leukemia, in relapse                                                    |
| 20590 | Unspecified myeloid leukemia, without mention of having achieved remission            |
| 20592 | Unspecified myeloid leukemia, in relapse                                              |
| 20780 | Other specified leukemia, without mention of having achieved remission                |
| 20800 | Acute leukemia of unspecified cell type, without mention of having achieved remission |
| 20880 | Other leukemia of unspecified cell type, without mention of having achieved remission |
| 20890 | Unspecified leukemia, without mention of having achieved remission                    |
| 20892 | Unspecified leukemia, in relapse                                                      |
| 2375  | Neoplasm of uncertain behavior of brain and spinal cord                               |
| 23873 | High grade myelodysplastic syndrome lesions                                           |
| 2391  | Neoplasm of unspecified nature of respiratory system                                  |
| 2396  | Neoplasm of unspecified nature of brain                                               |
| 78951 | Malignant ascites                                                                     |

*Supplemental Table E2: Previously published ICD-9-CM codes associated with a life-limiting malignancy converted to corresponding ICD-10-CM codes based on the CMS General Equivalency Mappings.*

ICD-10

| Code | Diagnosis                                                       |
|------|-----------------------------------------------------------------|
| C153 | Malignant neoplasm of upper third of esophagus                  |
| C154 | Malignant neoplasm of middle third of esophagus                 |
| C155 | Malignant neoplasm of lower third of esophagus                  |
| C153 | Malignant neoplasm of upper third of esophagus                  |
| C154 | Malignant neoplasm of middle third of esophagus                 |
| C155 | Malignant neoplasm of lower third of esophagus                  |
| C158 | Malignant neoplasm of overlapping sites of esophagus            |
| C159 | Malignant neoplasm of esophagus, unspecified                    |
| C160 | Malignant neoplasm of cardia                                    |
| C164 | Malignant neoplasm of pylorus                                   |
| C163 | Malignant neoplasm of pyloric antrum                            |
| C161 | Malignant neoplasm of fundus of stomach                         |
| C162 | Malignant neoplasm of body of stomach                           |
| C165 | Malignant neoplasm of lesser curvature of stomach, unspecified  |
| C166 | Malignant neoplasm of greater curvature of stomach, unspecified |
| C168 | Malignant neoplasm of overlapping sites of stomach              |

C169 Malignant neoplasm of stomach, unspecified  
C220 Liver cell carcinoma  
C222 Hepatoblastoma  
C227 Other specified carcinomas of liver  
C228 Malignant neoplasm of liver, primary, unspecified as to type  
C221 Intrahepatic bile duct carcinoma  
C229 Malignant neoplasm of liver, not specified as primary or secondary  
C250 Malignant neoplasm of head of pancreas  
C251 Malignant neoplasm of body of pancreas  
C252 Malignant neoplasm of tail of pancreas  
C253 Malignant neoplasm of pancreatic duct  
C254 Malignant neoplasm of endocrine pancreas  
C257 Malignant neoplasm of other parts of pancreas  
C258 Malignant neoplasm of overlapping sites of pancreas  
C259 Malignant neoplasm of pancreas, unspecified  
C480 Malignant neoplasm of retroperitoneum  
C481 Malignant neoplasm of specified parts of peritoneum  
C488 Malignant neoplasm of overlapping sites of retroperitoneum and peritoneum  
C482 Malignant neoplasm of peritoneum, unspecified  
C260 Malignant neoplasm of intestinal tract, part unspecified  
C261 Malignant neoplasm of spleen  
C269 Malignant neoplasm of ill-defined sites within the digestive system  
C269 Malignant neoplasm of ill-defined sites within the digestive system  
C33 Malignant neoplasm of trachea  
C3400 Malignant neoplasm of unspecified main bronchus  
C3410 Malignant neoplasm of upper lobe, unspecified bronchus or lung  
C342 Malignant neoplasm of middle lobe, bronchus or lung  
C3430 Malignant neoplasm of lower lobe, unspecified bronchus or lung  
C3480 Malignant neoplasm of overlapping sites of unspecified bronchus and lung  
C3490 Malignant neoplasm of unspecified part of unspecified bronchus or lung  
C384 Malignant neoplasm of pleura  
C380 Malignant neoplasm of heart  
C381 Malignant neoplasm of anterior mediastinum

C382 Malignant neoplasm of posterior mediastinum  
C388 Malignant neoplasm of overlapping sites of heart, mediastinum and pleura  
C383 Malignant neoplasm of mediastinum, part unspecified  
C390 Malignant neoplasm of upper respiratory tract, part unspecified  
C399 Malignant neoplasm of lower respiratory tract, part unspecified  
C399 Malignant neoplasm of lower respiratory tract, part unspecified  
C710 Malignant neoplasm of cerebrum, except lobes and ventricles  
C711 Malignant neoplasm of frontal lobe  
C712 Malignant neoplasm of temporal lobe  
C713 Malignant neoplasm of parietal lobe  
C714 Malignant neoplasm of occipital lobe  
C715 Malignant neoplasm of cerebral ventricle  
C716 Malignant neoplasm of cerebellum  
C717 Malignant neoplasm of brain stem  
C718 Malignant neoplasm of overlapping sites of brain  
C719 Malignant neoplasm of brain, unspecified  
C761 Malignant neoplasm of thorax  
C762 Malignant neoplasm of abdomen  
C763 Malignant neoplasm of pelvis  
C768 Malignant neoplasm of other specified ill-defined sites  
C7839 Secondary malignant neoplasm of other respiratory organs  
C784 Secondary malignant neoplasm of small intestine  
C785 Secondary malignant neoplasm of large intestine and rectum  
C786 Secondary malignant neoplasm of retroperitoneum and peritoneum  
C787 Secondary malignant neoplasm of liver and intrahepatic bile duct  
C787 Secondary malignant neoplasm of liver and intrahepatic bile duct  
C7889 Secondary malignant neoplasm of other digestive organs  
C7900 Secondary malignant neoplasm of unspecified kidney and renal pelvis  
C7911 Secondary malignant neoplasm of bladder  
C7919 Secondary malignant neoplasm of other urinary organs  
C792 Secondary malignant neoplasm of skin  
C7931 Secondary malignant neoplasm of brain  
C7932 Secondary malignant neoplasm of cerebral meninges  
C7949 Secondary malignant neoplasm of other parts of nervous system  
C7951 Secondary malignant neoplasm of bone  
C7952 Secondary malignant neoplasm of bone marrow

C7960 Secondary malignant neoplasm of unspecified ovary  
 C7970 Secondary malignant neoplasm of unspecified adrenal gland  
 C7981 Secondary malignant neoplasm of breast  
 C7982 Secondary malignant neoplasm of genital organs  
 C7989 Secondary malignant neoplasm of other specified sites  
 C800 Disseminated malignant neoplasm, unspecified  
 C801 Malignant (primary) neoplasm, unspecified  
 C802 Malignant neoplasm associated with transplanted organ  
 C9200 Acute myeloblastic leukemia, not having achieved remission  
 C9240 Acute promyelocytic leukemia, not having achieved remission  
 C9250 Acute myelomonocytic leukemia, not having achieved remission  
 C9202 Acute myeloblastic leukemia, in relapse  
 C9242 Acute promyelocytic leukemia, in relapse  
 C9252 Acute myelomonocytic leukemia, in relapse  
 C9220 Atypical chronic myeloid leukemia, BCR/ABL-negative, not having achieved remission  
 C9222 Atypical chronic myeloid leukemia, BCR/ABL-negative, in relapse  
 C9230 Myeloid sarcoma, not having achieved remission  
 C9232 Myeloid sarcoma, in relapse  
 C92Z0 Other myeloid leukemia not having achieved remission  
 C92Z2 Other myeloid leukemia, in relapse  
 C9290 Myeloid leukemia, unspecified, not having achieved remission  
 C9292 Myeloid leukemia, unspecified in relapse  
 C9430 Mast cell leukemia not having achieved remission  
 C9480 Other specified leukemias not having achieved remission  
 C9500 Acute leukemia of unspecified cell type not having achieved remission  
 C9590 Leukemia, unspecified not having achieved remission  
 C9590 Leukemia, unspecified not having achieved remission  
 C9592 Leukemia, unspecified, in relapse  
 D432 Neoplasm of uncertain behavior of brain, unspecified  
 D434 Neoplasm of uncertain behavior of spinal cord  
 D4622 Refractory anemia with excess of blasts 2  
 D491 Neoplasm of unspecified behavior of respiratory system  
 D496 Neoplasm of unspecified behavior of brain  
 R180 Malignant ascites



## Additional Results

### Association with ICU Beds

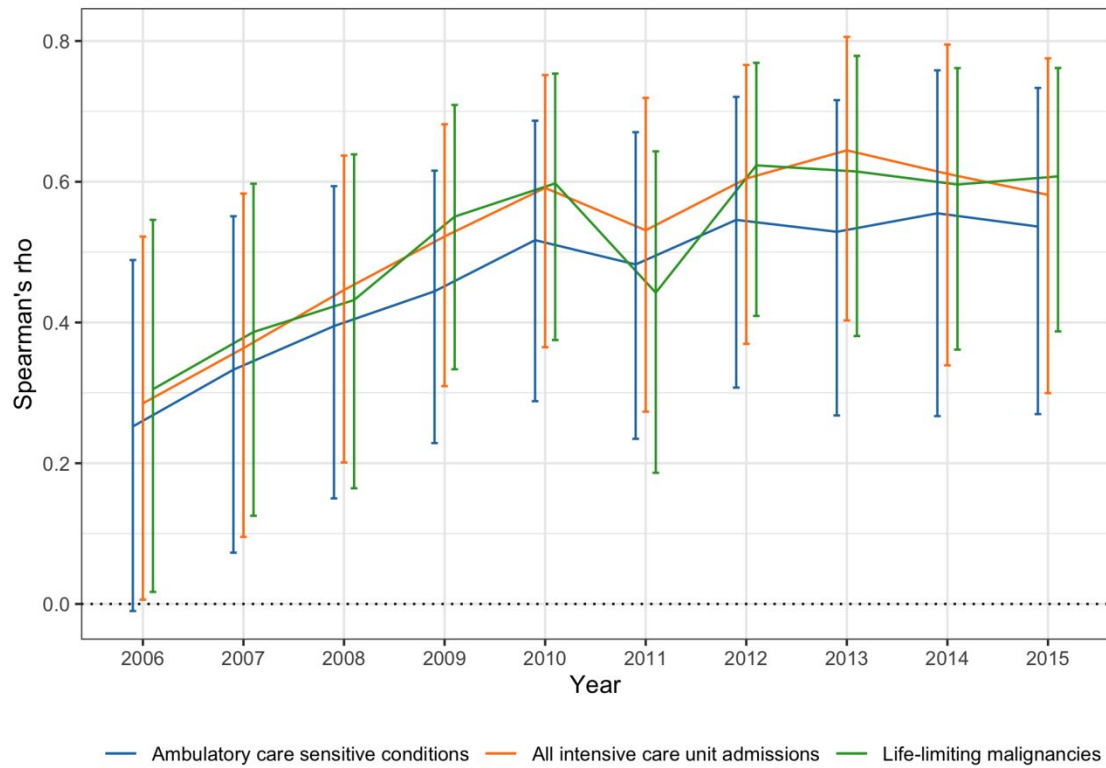

*Figure E1: Correlation between available ICU beds and potentially preventable hospitalizations requiring ICU care across states.*

The following figures E2 and E3 are presented as a visual check that the bootstrapped distributions of the differences in correlations were roughly normally distributed.

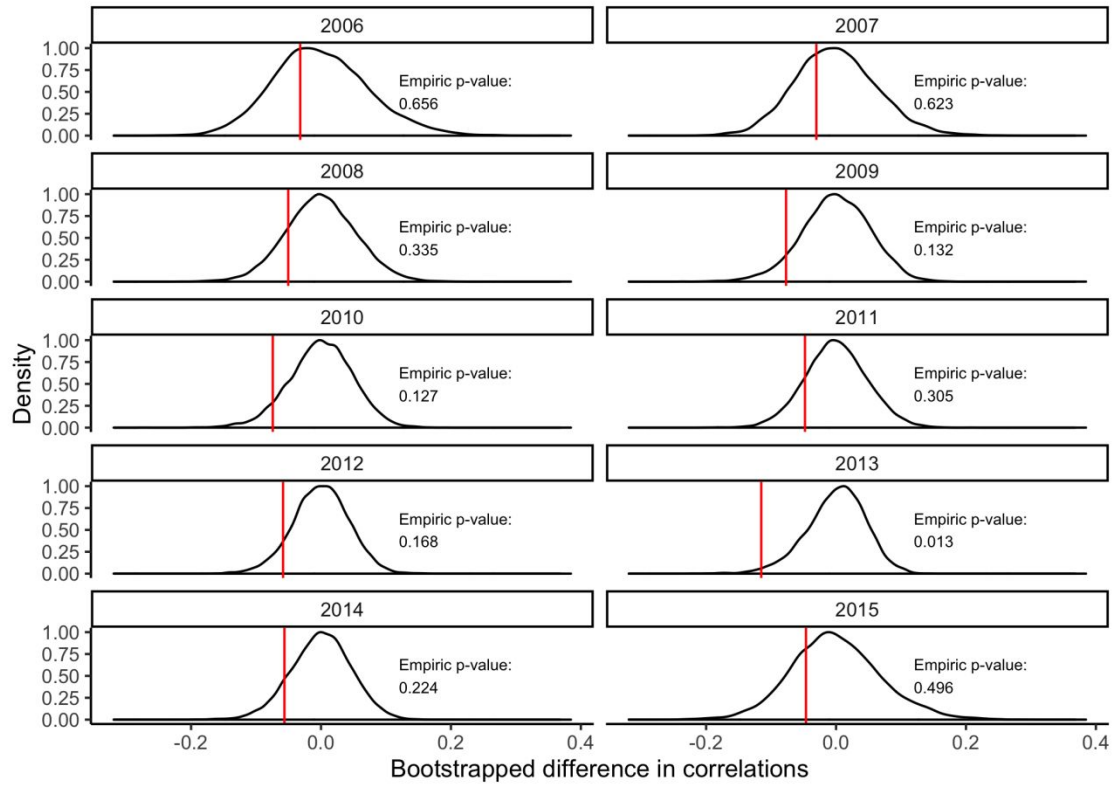

*Figure E2: A bootstrapped estimate of the difference between correlation between ICU beds and all ICU admissions, and between ICU beds and ICU admissions associated with ACSC was calculated with 10,000 replicates. The distribution of differences between these values was mean-normalized across each year.*

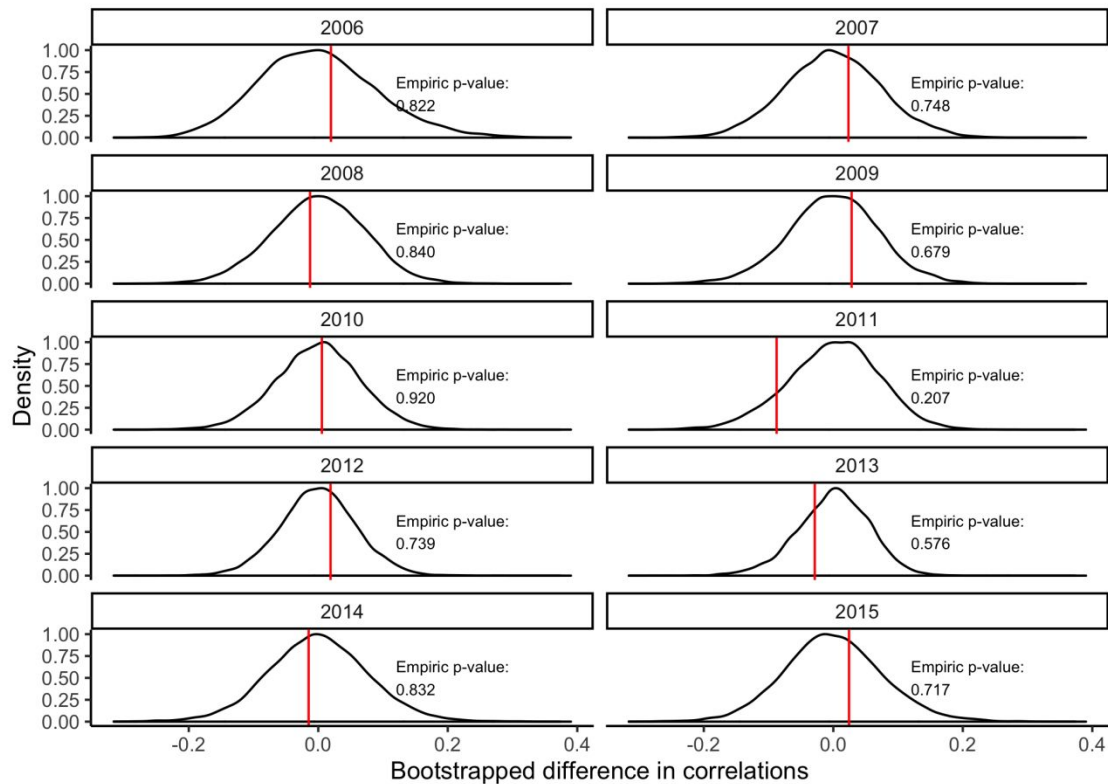

Figure E3: A bootstrapped estimate of the difference between correlations between ICU beds and all ICU admissions, and between ICU beds and ICU admissions associated with LLMs was calculated with 10,000 replicates. The distribution of differences between these values was mean-normalized across each year.

### State comparisons

We calculated geographic differences at the state level (including Washington, DC, and Puerto Rico) in the MedPAR database. For between-state comparisons, we adjusted admission rates based on 2010 US Census data for each states' population distribution of age and gender (4). We identified the quintile of states with the lowest proportion of ICU admissions associated with each potentially preventable diagnosis. The following figures E4 and E5 demonstrate the state-level heterogeneity in admission rates, and use the lowest-admitting states to provide a conservative reference point for what a hypothetical floor on such a value might look like.

We observed a two-fold variation among states in potentially preventable ICU admissions in the FFS population (XXX). Among hospitalizations with ICU care, the average proportion with an ACSC ranged from 9.2% (95% CI 8.9 - 9.6) in North Dakota to 21.4% (95% CI 21.0 - 21.8) in Puerto Rico. The average proportion of hospitalizations with ICU care associated with a LLM ranged from 3.9% (95% CI 3.7 - 4.1) in Puerto Rico to 7.6% (95% CI 7.3 - 7.9) in Delaware.

Among hospitalizations associated with an ICU admission in the lowest quintile of states by ICU admission rates in the FFS population, 11.8% were for ACSCs (Supplemental Figure E4)

and 5.0% for LLMs (Supplemental Figure E5). If these estimates represented a lower-bound on achievable admission rates, we would still have observed 59,024 and 19,581 average yearly preventable hospital admissions with ICU care in the remaining states for ACSCs and LLMs, respectively.

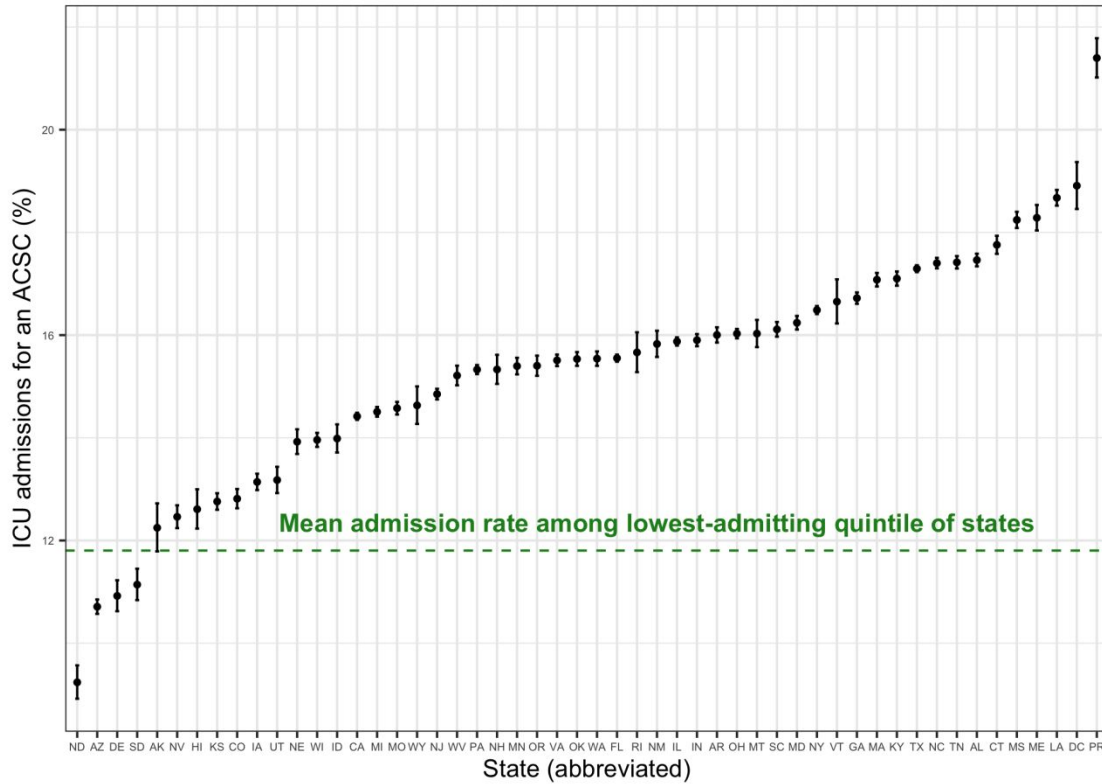

Figure E4: Variation in the percentage of intensive care unit (ICU)-associated hospitalizations with administrative codes for ambulatory care sensitive conditions (ACSCs). Green dotted line indicates the mean admission rate among the lowest-admitting quintile of states.

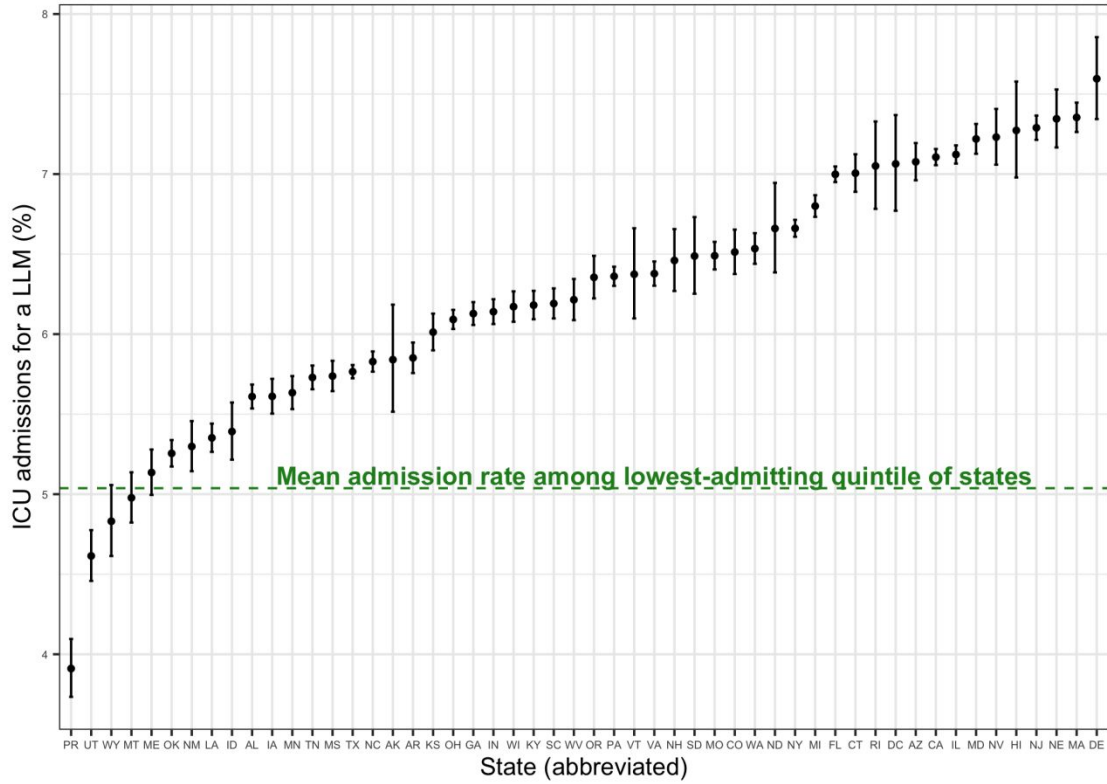

Figure E5: Variation in the percentage of intensive care unit (ICU)-associated hospitalizations with administrative codes for life-limiting malignancies (LLMs). Green dotted line indicates the mean admission rate among the lowest-admitting quintile of states.

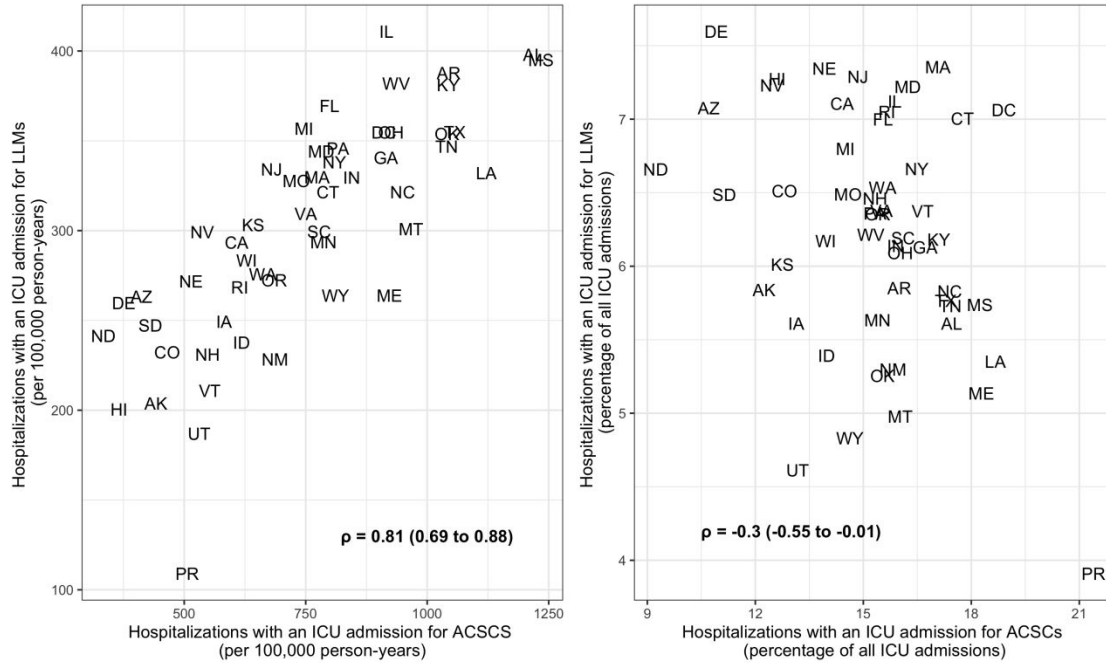

*Figure E6: State-level differences in rates of intensive care unit (ICU) admissions for a potentially preventable cause among Medicare Fee-for-Service beneficiaries at least 65 years old adjusted for the age and gender distribution in each state (left panel), and as an unadjusted percentage of all ICU admissions (right panel). The y-axis shows admissions for life-limiting malignancies (LLMs) and the x-axis shows those for ambulatory care sensitive conditions (ACSCs). Correlations represent averages over the ten-year study period. Notably, state populations change relatively little while available ICU beds for admissions change rapidly and heterogeneously across states.*

## Sensitivity analysis

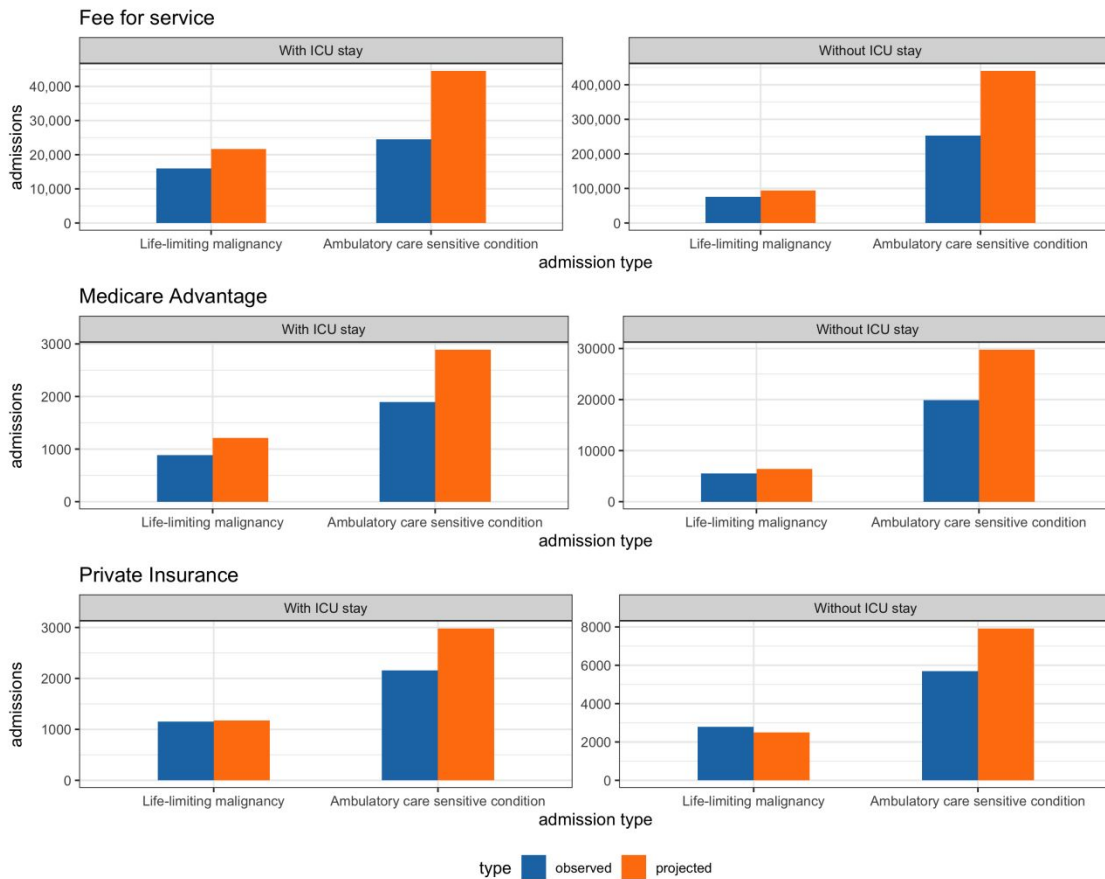

Figure E7: Sensitivity analysis results. Comparison of the observed and projected admission types in the fourth quarter of 2015. While observed and projected admissions differed substantially, the overall ten-year trends when calculated using the projected rates did not meaningfully differ.

## Admissions by age among those with private insurance

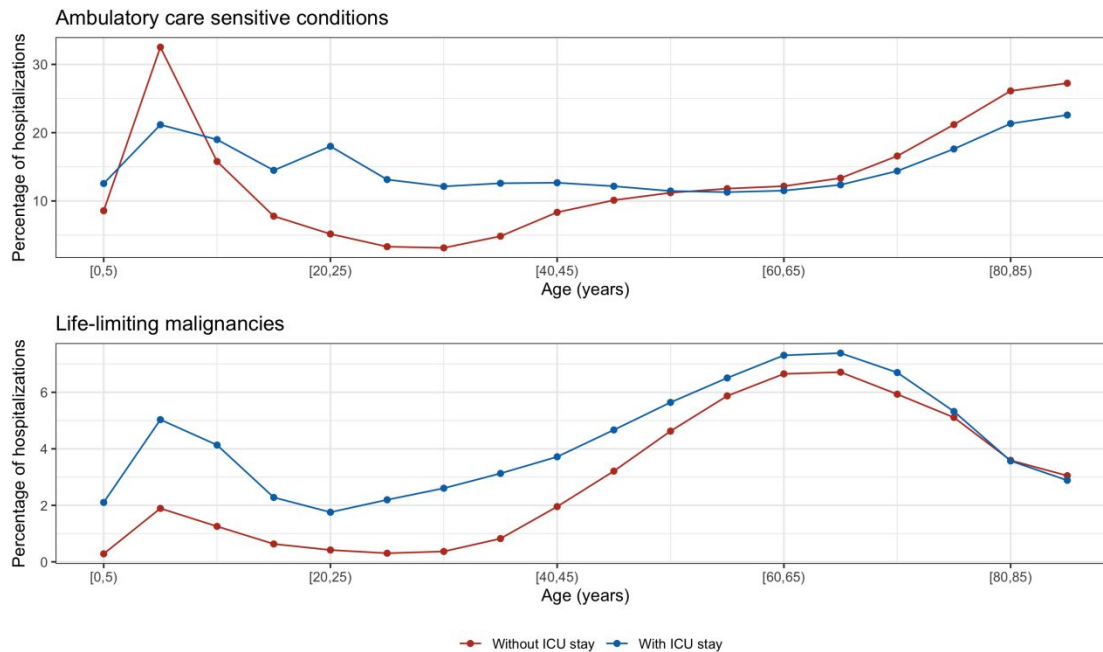

Figure E8: Among those with private insurance, the proportion of potentially preventable hospitalizations by age, stratified by whether or not the hospitalization was associated with an intensive care unit (ICU) stay. Notably, the privately insured cohort includes patients from newborns through age 65, in addition to those over 65.

## References

1. Weissman GE, Hubbard RA, Kohn R, Anesi GL, Manaker S, Kerlin MP, Halpern SD. Validation of an administrative definition of intensive care unit admission using revenue center codes. *Crit Care Med* 2017;45:e758–e762.
2. Workgroup PQICM. Guide to Prevention Quality Indicators: Hospital Admission for Ambulatory Care Sensitive Conditions. 2014;
3. Obermeyer Z, Powers BW, Makar M, Keating NL, Cutler DM. Physician characteristics strongly predict patient enrollment in hospice. *Health Affairs* 2015;34:993–1000.
4. US Census Bureau PD. Annual Estimates of the Resident Population for Selected Age Groups by Sex for the United States, States, Counties, and Puerto Rico Commonwealth and Municipios: April 1, 2010 to July 1, 2014. 2015;
